# Supplementary material for: Development of an antimicrobial and antioxidant hydrogel/nano-electrospun wound dressing
Source: Royal Society of Chemistry journal article supplement (doi:10.1039/d0ra05935h), 2020-01-01
Supplement: d0ra05935h1.pdf [file d0ra05935h1.pdf]

## SUPPORTING INFORMATION

### **Development of an antimicrobial and antioxidant hydrogel/nano-electrospun composite for multifunctional wound dressing**

*Alejandra Romero-Montero,<sup>a</sup> Pablo Labra-Vázquez,<sup>b</sup> Luis J. del Valle,<sup>c</sup> Jordi Puiggali,<sup>c,d</sup> Carmina Montiel,<sup>a</sup> Roeb García-Arrazola,<sup>a</sup> Miquel Gimeno<sup>a\*</sup>*

<sup>a</sup> Departamento de Alimentos y Biotecnología, Facultad de Química, Universidad Nacional Autónoma de México, 04510 CDMX, México

<sup>b</sup> Facultad de Química, Departamento de Química Orgánica, Universidad Nacional Autónoma de México, Ciudad Universitaria, Ciudad de México, 04510, Mexico

<sup>c</sup> Chemical Engineering Department, Universitat Politècnica de Catalunya, Escola d'Enginyeria de Barcelona Est-EEBE, c/Eduard Maristany 10-14, 08019 Barcelona, Spain

<sup>d</sup> Institute for Bioengineering of Catalonia (IBEC), The Barcelona

Supplementary data file 1. FT-IR spectra for PCL (a), PGAL (b) and PCL-g-PGAL (c)

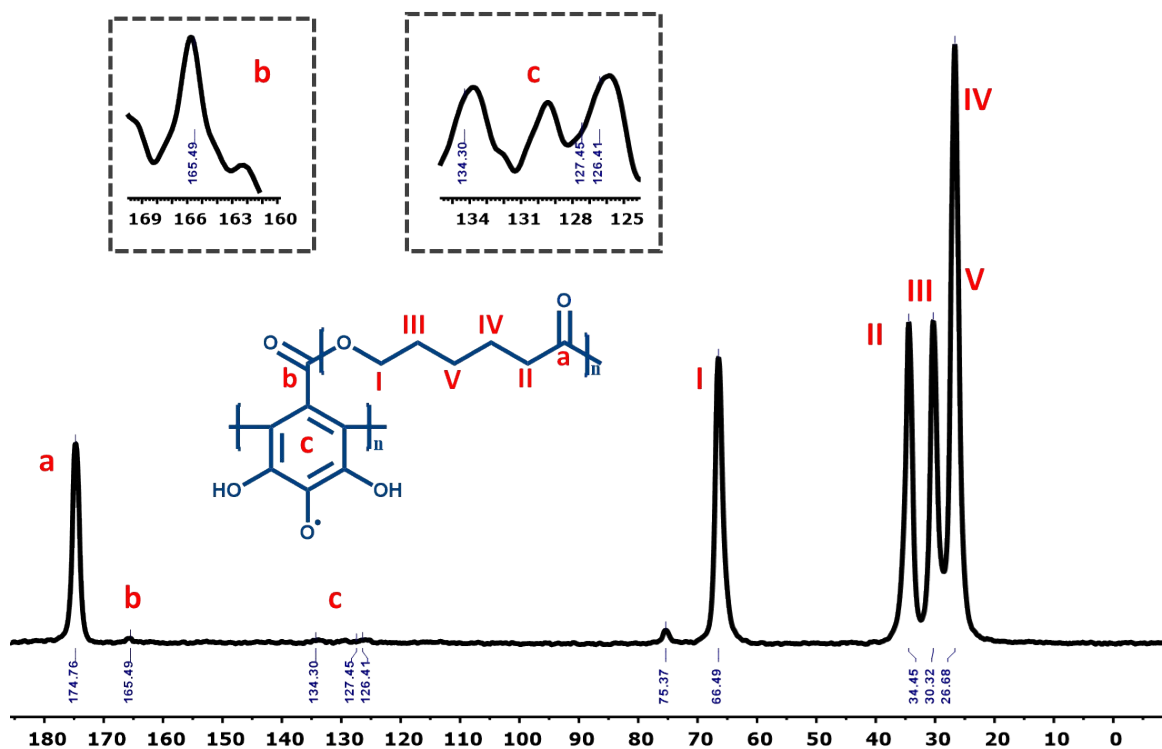

Figure S1. Representative CP/MAS  $^{13}\text{C}$ -NMR spectrum of the PCL-g-PGAL, taken at 400 MHz with spinning frequency of 10 kHz.

Supplementary data file 2. FT-IR spectra for PCL (a), PGAL (b) and PCL-g-PGAL (c)

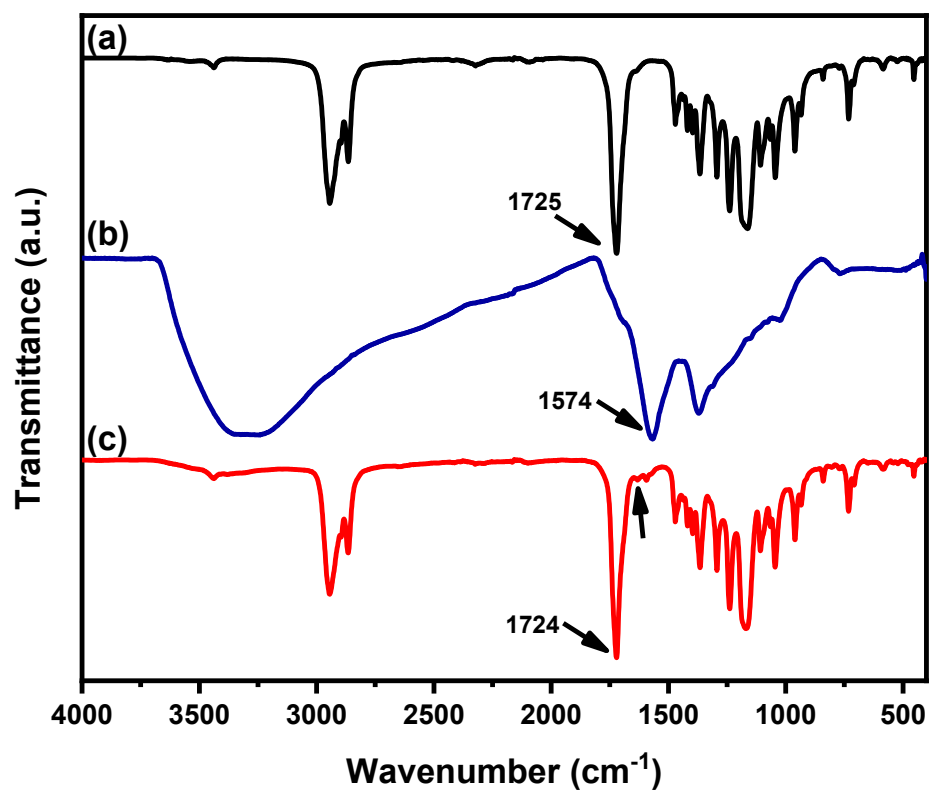

Figure S2. FT-IR spectra for PCL (a), PGAL (b) and PCL-g-PGAL (c)

Supplementary data file 3. DPPH analysis for PCL-g-PGAL

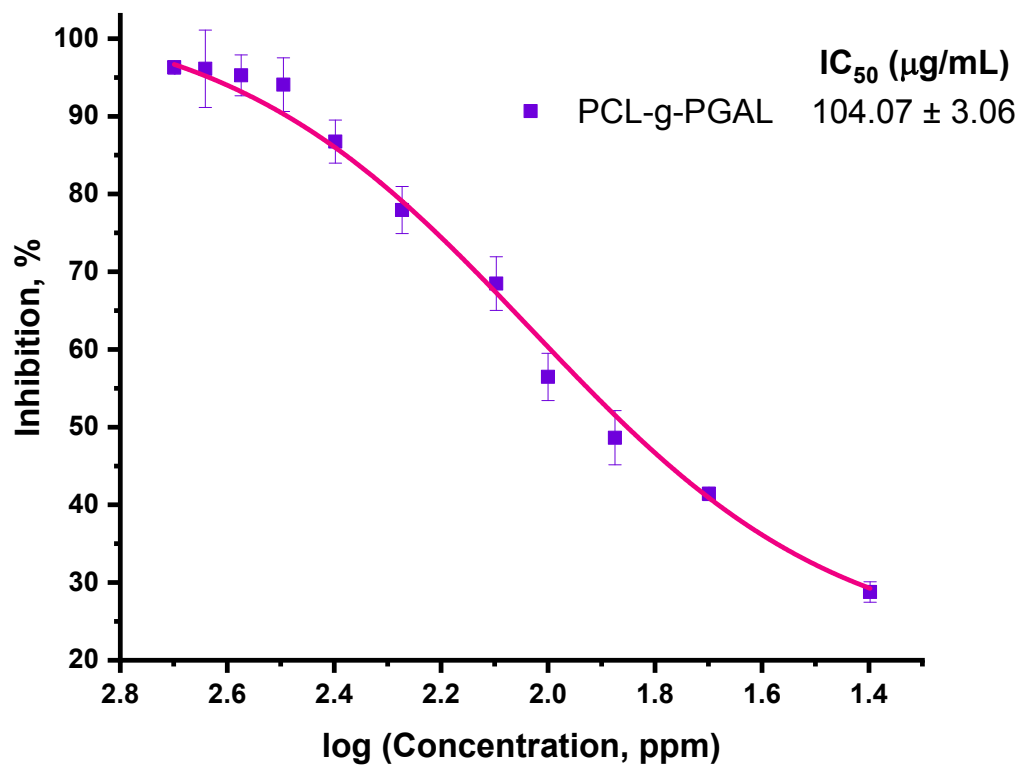

**Figure S3.** Reduction of the DPPH radical in the presence of PCL-g-PGAL. Values expressed as mean percent inhibition of DPPH in 3 experiments.

**Supplementary data file for the optimized coordinates for S1 at the M06-2X/6-311++G(d,p) level of theory.**

|   |          |          |          |
|---|----------|----------|----------|
| C | -7.11550 | -0.00530 | -0.20840 |
| C | -5.76910 | 0.44590  | 0.32180  |
| C | -4.61020 | -0.27520 | -0.36130 |
| C | -3.25510 | 0.17050  | 0.18170  |
| H | -7.24200 | -1.08170 | -0.04250 |
| H | -7.17440 | 0.18150  | -1.28720 |
| H | -5.73520 | 0.26490  | 1.40130  |
| H | -5.67440 | 1.52650  | 0.17100  |
| H | -4.64870 | -0.09030 | -1.44090 |
| H | -4.71820 | -1.35730 | -0.22380 |
| H | -3.20480 | -0.02740 | 1.25640  |
| H | -3.14400 | 1.25170  | 0.05500  |
| C | -2.10500 | -0.54060 | -0.51760 |
| H | -2.17950 | -1.62740 | -0.40680 |
| H | -2.10700 | -0.34560 | -1.59470 |
| O | -8.13110 | 0.72350  | 0.47570  |
| H | -8.98770 | 0.44540  | 0.14020  |
| C | -0.76180 | -0.13240 | 0.01010  |
| O | -0.53760 | 0.62930  | 0.90370  |
| C | 2.11910  | 0.67740  | -0.34490 |
| C | 1.54470  | -0.55570 | -0.35900 |
| C | 2.31790  | -1.75250 | -0.08010 |
| C | 3.74190  | -1.55300 | 0.20700  |
| C | 4.30980  | -0.29050 | 0.22530  |
| C | 3.50340  | 0.80480  | -0.04770 |
| O | 1.85790  | -2.90130 | -0.06940 |
| O | 0.23340  | -0.77890 | -0.68150 |

|   |         |          |          |
|---|---------|----------|----------|
| O | 4.45560 | -2.63840 | 0.45170  |
| C | 4.14810 | 2.15060  | -0.02510 |
| O | 3.29260 | 3.13790  | -0.30100 |
| O | 5.31470 | 2.33080  | 0.21510  |
| H | 1.53150 | 1.55940  | -0.55780 |
| H | 3.85980 | -3.40650 | 0.39070  |
| H | 5.36140 | -0.16130 | 0.44560  |
| H | 3.76970 | 3.98010  | -0.27160 |

**Optimized coordinates for S2 at the M06-2X/6-311++G(d,p) level of theory**

|   |          |          |          |
|---|----------|----------|----------|
| C | -2.62890 | 0.87450  | 0.07750  |
| C | -3.81670 | 1.56770  | 0.06770  |
| C | -5.08990 | 0.86800  | -0.01330 |
| C | -5.05550 | -0.58510 | -0.08240 |
| C | -3.85950 | -1.26000 | -0.06710 |
| C | -2.66470 | -0.52680 | 0.01100  |
| O | -6.16730 | 1.49020  | -0.02390 |
| O | -3.86070 | 2.89710  | 0.13270  |
| O | -6.22710 | -1.21500 | -0.15910 |
| C | -1.39280 | -1.31680 | 0.03080  |
| O | -1.36010 | -2.52350 | 0.04730  |
| H | -1.68850 | 1.40400  | 0.13860  |
| H | -4.79290 | 3.16960  | 0.11090  |
| H | -6.93000 | -0.54470 | -0.15380 |
| H | -3.83260 | -2.34040 | -0.11470 |
| C | 0.96190  | -1.22060 | 0.06590  |
| C | 2.04260  | -0.16510 | -0.00980 |
| C | 3.43300  | -0.79010 | 0.07890  |
| C | 4.53930  | 0.25420  | -0.04530 |

|   |          |          |          |
|---|----------|----------|----------|
| H | 1.02010  | -1.79650 | 0.99300  |
| H | 1.01320  | -1.91410 | -0.77640 |
| H | 1.90370  | 0.55120  | 0.80570  |
| H | 1.93960  | 0.38500  | -0.95020 |
| H | 3.55090  | -1.54080 | -0.71090 |
| H | 3.53550  | -1.31880 | 1.03330  |
| H | 4.41600  | 1.01660  | 0.72950  |
| H | 4.45460  | 0.76750  | -1.00760 |
| C | 5.92130  | -0.37140 | 0.07550  |
| H | 6.04700  | -0.87560 | 1.03890  |
| H | 6.07870  | -1.13880 | -0.68930 |
| O | -0.31150 | -0.54510 | 0.02890  |
| C | 7.03750  | 0.62760  | -0.05640 |
| O | 6.90820  | 1.80860  | -0.25780 |
| O | 8.24290  | 0.05080  | 0.07790  |
| H | 8.92250  | 0.73460  | -0.01370 |

**Optimized coordinates for S1-TS at the M06-2X/6-311++G(d,p) level of theory**

|   |          |          |          |
|---|----------|----------|----------|
| O | 1.02480  | 1.87480  | -0.73150 |
| O | 0.59500  | 0.75660  | 1.29750  |
| O | -0.36010 | -0.23710 | -0.77680 |
| C | 0.95880  | 0.48690  | 0.20310  |
| H | 1.17450  | 1.66630  | -1.66580 |
| H | 0.03020  | 2.19030  | -0.63400 |
| C | -4.32190 | 0.46350  | 0.25270  |
| C | -3.46860 | 1.52190  | 0.16170  |
| C | -2.07690 | 1.33480  | -0.20790 |
| C | -1.58970 | -0.02780 | -0.44660 |

|   |          |          |          |
|---|----------|----------|----------|
| C | -2.51430 | -1.08700 | -0.34960 |
| C | -3.82790 | -0.84280 | -0.01330 |
| O | -1.35990 | 2.36520  | -0.34070 |
| O | -3.87090 | 2.78150  | 0.39120  |
| C | -4.73910 | -2.02330 | 0.07640  |
| O | -5.98470 | -1.69180 | 0.43040  |
| O | -4.39970 | -3.15850 | -0.14500 |
| H | -5.35760 | 0.62070  | 0.51970  |
| H | -3.10910 | 3.36590  | 0.25440  |
| H | -2.17170 | -2.09620 | -0.53700 |
| H | -6.51770 | -2.49920 | 0.47260  |
| C | 7.08570  | -1.08510 | -0.09910 |
| C | 5.93530  | -0.18320 | 0.30250  |
| C | 4.59000  | -0.72570 | -0.17270 |
| C | 3.42870  | 0.17670  | 0.23700  |
| H | 7.11580  | -1.19000 | -1.19000 |
| H | 6.94800  | -2.08260 | 0.33440  |
| H | 6.10380  | 0.81350  | -0.11880 |
| H | 5.93120  | -0.07860 | 1.39250  |
| H | 4.43120  | -1.72870 | 0.23930  |
| H | 4.60070  | -0.83070 | -1.26350 |
| H | 3.58300  | 1.18170  | -0.16750 |
| H | 3.39760  | 0.26860  | 1.32670  |
| C | 2.09170  | -0.37650 | -0.26030 |
| H | 2.07200  | -0.46540 | -1.34710 |
| H | 1.90400  | -1.36840 | 0.15830  |
| O | 8.29600  | -0.50240 | 0.37530  |
| H | 9.02980  | -1.06790 | 0.11970  |



**Optimized coordinates for S2-TS at the M06-2X/6-311++G(d,p) level of theory**

|   |          |          |          |
|---|----------|----------|----------|
| O | -0.71790 | -0.68850 | 1.98980  |
| O | -0.20740 | 1.22090  | 0.54160  |
| O | -0.16140 | -1.08560 | -0.07930 |
| C | -0.86560 | 0.21440  | 0.54100  |
| H | -1.56320 | -1.01470 | 2.32520  |
| H | -0.22300 | -1.36340 | 1.04040  |
| C | 1.13890  | -0.86380 | -0.66360 |
| C | 2.24630  | -0.93590 | 0.37090  |
| C | 3.61700  | -0.75290 | -0.27630 |
| C | 4.75050  | -0.83750 | 0.74420  |
| H | 1.25380  | -1.63280 | -1.42840 |
| H | 1.11110  | 0.11650  | -1.14300 |
| H | 2.20250  | -1.90740 | 0.87640  |
| H | 2.08250  | -0.16180 | 1.12670  |
| H | 3.65310  | 0.21680  | -0.78370 |
| H | 3.76500  | -1.52110 | -1.04400 |
| H | 4.72200  | -1.81340 | 1.23670  |
| H | 4.60450  | -0.08180 | 1.52120  |
| C | 6.12540  | -0.65360 | 0.11420  |
| H | 6.92190  | -0.87970 | 0.83080  |
| H | 6.27510  | -1.33030 | -0.73130 |
| C | 6.37890  | 0.75420  | -0.35780 |
| O | 5.72850  | 1.72580  | -0.06440 |
| O | 7.46150  | 0.82960  | -1.14820 |
| H | 7.59680  | 1.75590  | -1.39560 |
| C | -2.95720 | -1.04660 | -0.17040 |
| C | -4.30340 | -1.03310 | -0.45020 |

|   |          |          |          |
|---|----------|----------|----------|
| C | -5.07130 | 0.19910  | -0.37970 |
| C | -4.36090 | 1.40950  | -0.00540 |
| C | -3.01330 | 1.37820  | 0.27050  |
| C | -2.33040 | 0.15770  | 0.18700  |
| O | -6.29110 | 0.21600  | -0.63530 |
| O | -4.96310 | -2.13610 | -0.80210 |
| O | -5.07020 | 2.53540  | 0.05440  |
| H | -2.40140 | -1.97160 | -0.24040 |
| H | -5.89140 | -1.89350 | -0.95370 |
| H | -5.98880 | 2.32370  | -0.18070 |
| H | -2.48310 | 2.28090  | 0.54370  |
